# Supplementary material for: Synthesis of New Phosphonylated Bis-1,3,4-oxadiazoles and Study of Their Antimicrobial and Antiviral Activity
Source: Research Square preprint supplement (doi:10.21203/rs.3.rs-7856319/v1), 2025-11-03
Supplement: Supplementary file 1 [file a66bad36df1774a98ba0a2bb.docx]

**Synthesis of new phosphonylated bis-1,3,4-oxadiazoles and study of their antimicrobial and antiviral activity**

**_____________________________________________________________________________**

**Elizaveta A. Gerasimova1,2**, **Dmitry M. Egorov1,2*, Aleksandr S. Krylov1,2, Ekaterina N. Chernova1,** **Dar`ya V. Spiridonova4**, **Irina L. Kuzikova1**, **Tatyana B. Zaytsev1,Zoya A. Zhakovskaya1, Alexandrina S. Volobueva3 Maria A. Niukalova 3,** **Vladimir V. Zarubaev 3**

1 St. Petersburg Federal Research Center of the Russian Academy of Sciences (SPC RAS),

39, 14th Line V.O., St. Petersburg, 199178, Russia

2 St. Petersburg State Institute of Technology (Technical University), 26, Moskovski ave., St. Petersburg, 190013, Russia

3 Saint Petersburg Pasteur Research Institute, 14 Mira Street, 197101 St. Petersburg, Russia

4 Saint-Petersburg State University, 7-9, Universitetskaya Embankment, St. Petersburg, 199034, Russia

* Correspondence: diavoly@mail.ru

| Figure S1. 1H, 13C and 31P spectra of compound 3aa | 2-3 |
| --- | --- |
| Figure S2. ESI-MS spectra of compound 3aa | 3 |
| Figure S3. 1H, 13C and 31P spectra of compound 3ab | 4-5 |
| Figure S4. ESI-MS spectra of compound 3ab | 5 |
| Figure S5. 1H, 13C and 31P spectra of compound 3ac | 6-7 |
| Figure S6. ESI-MS spectra of compound 3ac | 7 |
| Figure S7. 1H, 13C and 31P spectra of compound 3bc | 8-9 |
| Figure S8. ESI-MS spectra of compound 3bc | 9 |
| Figure S9. 1H, 13C and 31P spectra of compound 3cc | 10-11 |
| Figure S10. ESI-MS spectra of compound 3cc | 11 |
| Figure S11. 1H, 13C and 31P spectra of compound 3ad | 12-13 |
| Figure S12. ESI-MS spectra of compound 3ad | 13 |
| Figure S13. 1H, 13C and 31P spectra of compound 3ae | 14-15 |
| Figure S14. ESI-MS spectra of compound 3ae | 15 |
| X-ray diffraction experiments | 16-20 |

Figure S1. 1H,13C, 31P spectra of compound 3aa


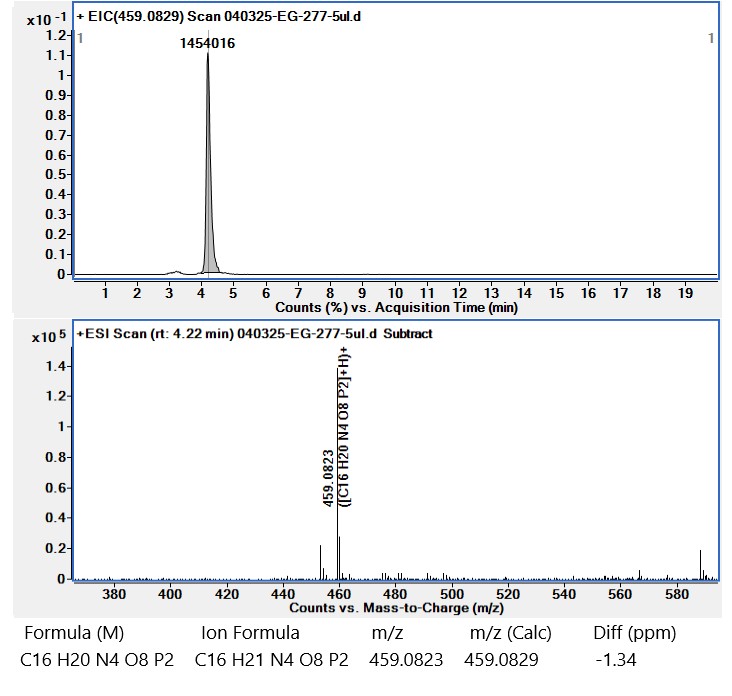


Figure S2. ESI-MS spectra of compound 3aa

Figure S3. 1H,13C, 31P spectra of compound 3ab


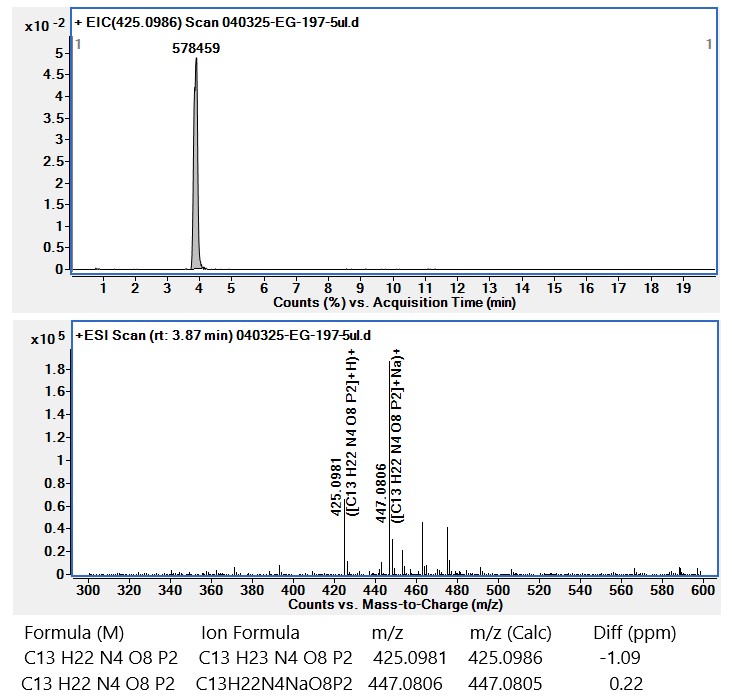


Figure S4. ESI-MS spectra of compound 3ab

Figure S5. 1H,13C, 31P spectra of compound 3ac


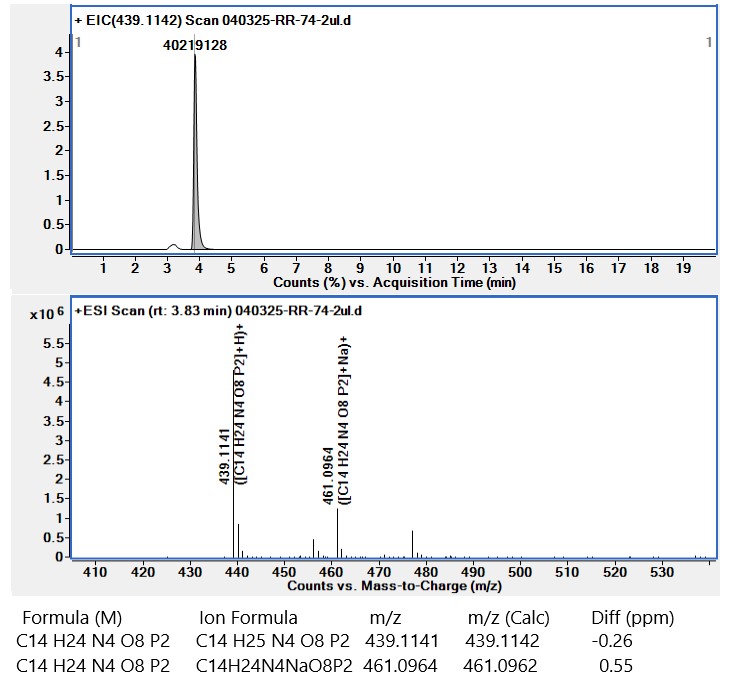


Figure S6. ESI-MS spectra of compound 3ac

Figure S7. 1H,13C, 31P spectra of compound 3bc


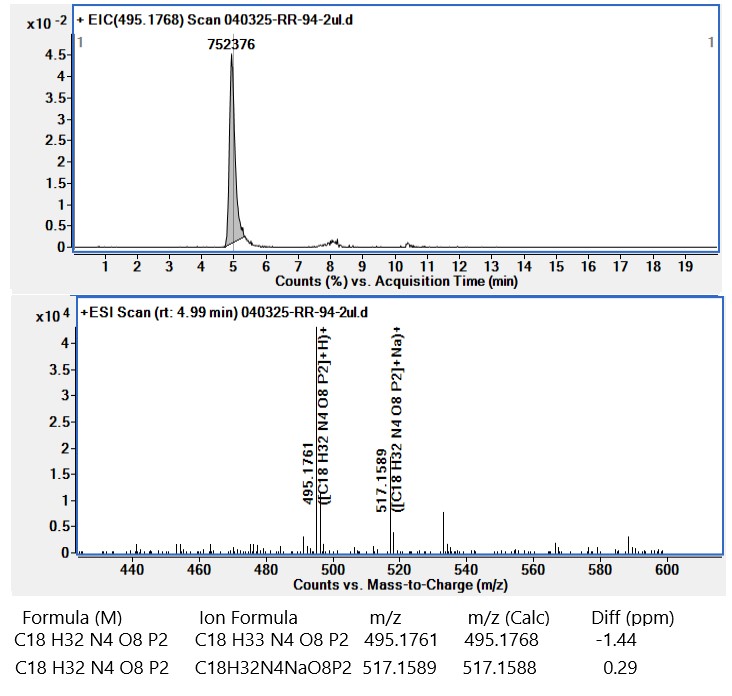


Figure S8. ESI-MS spectra of compound 3bc

Figure S9. 1H,13C, 31P spectra of compound 3cc


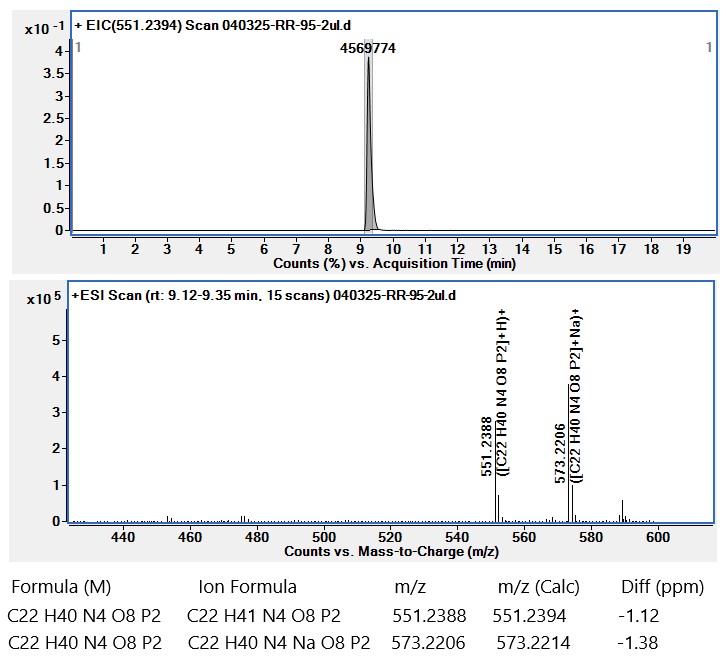


Figure S10. ESI-MS spectra of compound 3cc

Figure S11. 1H,13C, 31P spectra of compound 3ad


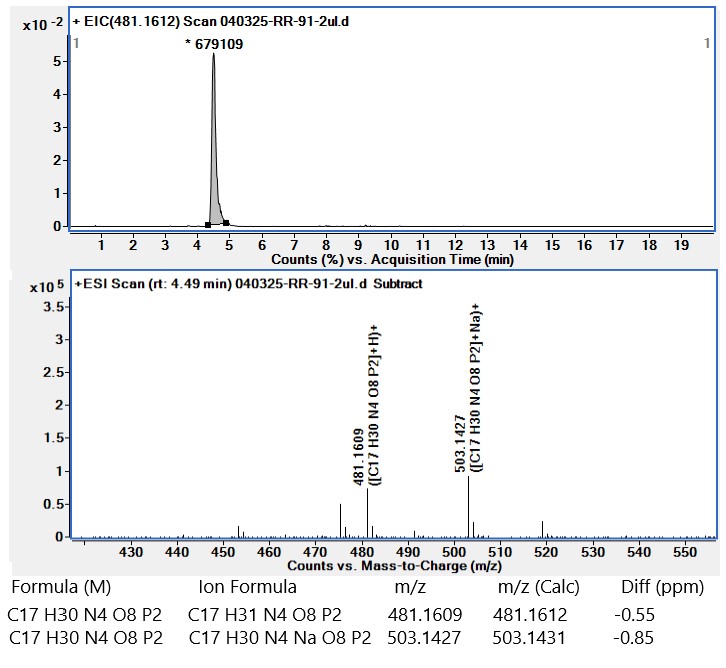


Figure S12. ESI-MS spectra of compound 3ad

Figure S13. 1H,13C, 31P spectra of compound 3ae


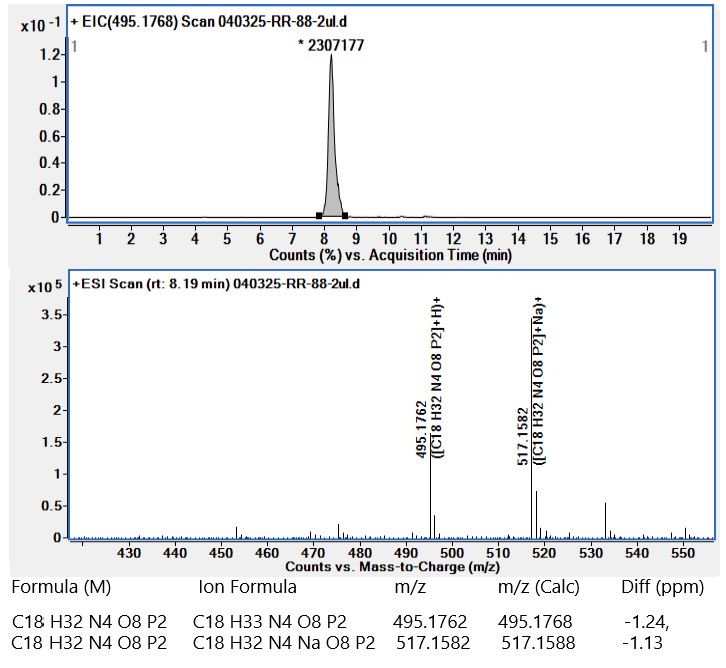


Figure S14. ESI-MS spectra of compound 3ae

**X-ray diffraction experiments**

The X-ray diffraction study of **3cc** (**EG-126)** was performed at 100(2) K on Rigaku Oxford Diffraction «XtaLAB Supernova» diffractometer (HyPix-3000 type detector) using Cu*Kα* (λ = 1.54184 Å) radiation. The structure was solved with the ShelXT [1] structure solution program using Intrinsic Phasing and refined with the ShelXL [2] refinement package incorporated in the OLEX2 program package [3] using Least Squares minimization. The hydrogen atom positions were fixed geometrically at calculated distances and allowed to ride on the parent atoms.

[1] Sheldrick, G., SHELXT - Integrated space-group and crystal-structure determination. *Acta Crystallographica Section A* **2015**, *71*, 3-8.

[2] Sheldrick GM. Crystal structure refinement with SHELXL. *Acta Crystallographica Section* C **2015**; 71, 3-8.

[3] Dolomanov, O. V.; Bourhis, L. J.; Gildea, R. J.; Howard, J. A. K.; Puschmann, H., OLEX2: a complete structure solution, refinement and analysis program. *Journal of Applied Crystallography* **2009**, *42*, 339-341.

CCDC for **3cc** (**EG-126)** is **2493467**


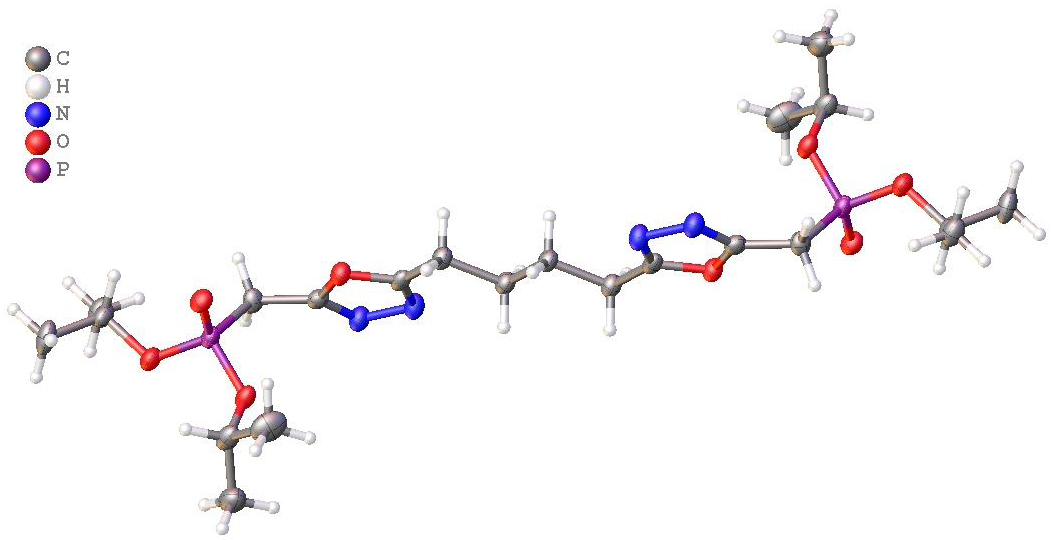


**Crystal Data** for C22H40N4O8P2 (*M*= 550.52 g/mol): triclinic, space group *P*-1 (no. 2), *a* = 5.7654(9) Å, *b* = 8.4737(8) Å, *c* = 14.8122(13) Å, *V*= 691.72(14) Å3, *Z*= 1, *T =*100(2) K, μ(Cu*Kα*) = 1.863 mm-1, *Dcalc* = 1.322 g/cm3, 4825 reflections measured (6.204° ≤ 2Θ ≤ 139.946°), 2499 unique (*R*int = 0.0346, Rsigma = 0.0370) which were used in all calculations. The final *R*1 was 0.0685 (*I* ≥ 2σ(*I*)) and *wR*2 was 0.1921 (*I* ≥ 2σ(*I*)).

**Table 1 Crystal data and structure refinement for 3cc (EG-126).**

| Identification code | EG-126 |
| --- | --- |
| Empirical formula | C22H40N4O8P2 |
| Formula weight | 550.52 |
| Temperature/K | 100(2) |
| Crystal system | triclinic |
| Space group | *P*-1 |
| *a*/Å | 5.7654(9) |
| *b*/Å | 8.4737(8) |
| *c*/Å | 14.8122(13) |
| *α*/° | 105.713(8) |
| *β*/° | 90.338(11) |
| *γ*/° | 96.430(10) |
| Volume/Å3 | 691.72(14) |
| *Z* | 1 |
| *ρ*calcg/cm3 | 1.322 |
| *μ*/mm‑1 | 1.863 |
| *F*(000) | 294.0 |
| Crystal size/mm3 | 0.1 × 0.08 × 0.02 |
| Radiation | Cu Kα (λ = 1.54184) |
| 2Θ range for data collection/° | 6.204 to 139.946 |
| Index ranges | -6 ≤ *h* ≤ 7, -9 ≤ *k* ≤ 10, -17 ≤ *l* ≤ 16 |
| Reflections collected | 4825 |
| Independent reflections | 2499 [*R*int = 0.0346, *R*sigma = 0.0370] |
| Data/restraints/parameters | 2499/0/167 |
| Goodness-of-fit on *F*2 | 1.144 |
| Final R indexes [I>=2σ (I)] | *R*1 = 0.0685, *wR*2 = 0.1921 |
| Final R indexes [all data] | *R*1 = 0.0805, *wR*2 = 0.2000 |
| Largest diff. peak/hole / e Å-3 | 0.51/-0.51 |

**Table 2 Fractional Atomic Coordinates (×104) and Equivalent Isotropic Displacement Parameters (Å2×103) for 3cc (EG-126). Ueq is defined as 1/3 of the trace of the orthogonalised UIJ tensor.**

| **Atom** | ***x*** | ***y*** | ***z*** | **U(eq)** |
| --- | --- | --- | --- | --- |
| C1 | 4405(7) | 4695(5) | 8704(3) | 25.3(8) |
| C2 | 2549(7) | 2949(4) | 9331(3) | 24.3(8) |
| C3 | 607(7) | 2167(5) | 9771(3) | 26.5(8) |
| C4 | 993(7) | 406(5) | 9775(3) | 26.6(8) |
| C5 | 4859(7) | 6168(5) | 8354(3) | 27.0(8) |
| C6 | 4571(7) | 9184(5) | 7280(3) | 30.1(9) |
| C7 | 7163(8) | 9636(5) | 7472(3) | 36.9(10) |
| C8 | 3626(8) | 9983(5) | 6582(4) | 40.9(11) |
| C9 | 978(8) | 4012(5) | 5950(3) | 34.1(10) |
| C10 | -1143(9) | 3040(7) | 6214(4) | 53.5(14) |
| C11 | 2168(9) | 3038(6) | 5126(3) | 44.8(12) |
| N1 | 5799(6) | 3625(4) | 8725(2) | 29.2(8) |
| N2 | 4576(6) | 2464(4) | 9138(2) | 28.4(7) |
| O1 | 2292(5) | 4358(3) | 9078.7(19) | 26.5(6) |
| O2 | 559(5) | 6787(3) | 7805(2) | 29.3(6) |
| O3 | 4131(5) | 7382(3) | 6874(2) | 30.3(7) |
| O4 | 2681(5) | 4485(3) | 6745.2(19) | 27.4(6) |
| P1 | 2786.7(17) | 6258.0(11) | 7446.6(7) | 24.6(3) |

**Table 3 Anisotropic Displacement Parameters (Å2×103) for 3cc (EG-126). The Anisotropic displacement factor exponent takes the form: -2π2[h2a*2U11+2hka*b*U12+…].**

| **Atom** | **U11** | **U22** | **U33** | **U23** | **U13** | **U12** |
| --- | --- | --- | --- | --- | --- | --- |
| C1 | 27.5(19) | 22.4(18) | 23.6(18) | 2.1(15) | -3.0(15) | 3.7(15) |
| C2 | 27.6(19) | 18.2(17) | 25.0(18) | 2.1(15) | -9.2(15) | 3.2(14) |
| C3 | 26.2(19) | 22.5(19) | 31(2) | 7.6(16) | -2.3(15) | 3.5(15) |
| C4 | 29(2) | 21.7(19) | 30(2) | 6.8(16) | -1.4(16) | 5.8(15) |
| C5 | 25.3(19) | 26.1(19) | 30(2) | 11.0(16) | -3.4(15) | -0.8(15) |
| C6 | 34(2) | 19.3(18) | 37(2) | 6.8(17) | 6.4(17) | 4.0(16) |
| C7 | 36(2) | 25(2) | 47(3) | 8.4(19) | -9.9(19) | 1.3(17) |
| C8 | 36(2) | 26(2) | 66(3) | 21(2) | -9(2) | 1.9(18) |
| C9 | 38(2) | 26(2) | 36(2) | 3.5(18) | -13.8(18) | 6.0(17) |
| C10 | 36(3) | 48(3) | 65(3) | -2(3) | -7(2) | -3(2) |
| C11 | 59(3) | 39(3) | 35(2) | 6(2) | -6(2) | 10(2) |
| N1 | 28.6(18) | 24.1(17) | 36.3(19) | 10.1(15) | -0.4(14) | 4.5(13) |
| N2 | 25.1(17) | 25.2(17) | 37.7(19) | 12.8(14) | -1.1(14) | 3.8(13) |
| O1 | 26.8(14) | 22.4(13) | 31.7(14) | 8.8(11) | -1.2(11) | 5.3(10) |
| O2 | 29.3(14) | 25.8(14) | 33.5(15) | 6.7(12) | -0.7(11) | 9.1(11) |
| O3 | 37.8(16) | 19.9(13) | 32.3(15) | 5.4(12) | -1.2(12) | 4.3(11) |
| O4 | 29.5(14) | 19.4(13) | 32.4(15) | 5.6(11) | -7.2(11) | 3.8(11) |
| P1 | 27.7(5) | 18.7(5) | 27.8(5) | 6.5(4) | -2.9(4) | 3.8(4) |

**Table 4 Bond Lengths for 3cc (EG-126).**

| **Atom** | **Length/Å** | **Atom** | **Length/Å** |
| --- | --- | --- | --- |
| C1-C5 | 1.475(5) | C6-C8 | 1.509(6) |
| C1-N1 | 1.283(5) | C6-O3 | 1.473(5) |
| C1-O1 | 1.375(5) | C9-C10 | 1.510(7) |
| C2-C3 | 1.481(6) | C9-C11 | 1.495(7) |
| C2-N2 | 1.290(5) | C9-O4 | 1.468(5) |
| C2-O1 | 1.367(5) | N1-N2 | 1.420(5) |
| C3-C4 | 1.535(5) | O2-P1 | 1.463(3) |
| C4-C41 | 1.521(8) | O3-P1 | 1.584(3) |
| C5-P1 | 1.815(4) | O4-P1 | 1.573(3) |
| C6-C7 | 1.506(6) |  |  |
| 1-X,-Y,2-Z | | | |

**Table 5 Bond Angles for 3cc (EG-126).**

| **Atom-Atom-Atom** | **Angle/˚** | **Atom-Atom-Atom** | **Angle/˚** |
| --- | --- | --- | --- |
| N1-C1-C5 | 127.7(4) | O4-C9-C10 | 108.4(4) |
| N1-C1-O1 | 112.1(3) | O4-C9-C11 | 106.9(4) |
| O1-C1-C5 | 120.1(3) | C1-N1-N2 | 106.5(3) |
| N2-C2-C3 | 127.9(3) | C2-N2-N1 | 106.3(3) |
| N2-C2-O1 | 112.2(3) | C2-O1-C1 | 102.9(3) |
| O1-C2-C3 | 119.9(3) | C6-O3-P1 | 120.2(3) |
| C2-C3-C4 | 111.6(3) | C9-O4-P1 | 119.0(2) |
| C41-C4-C3 | 111.9(4) | O2-P1-C5 | 113.82(18) |
| C1-C5-P1 | 114.4(3) | O2-P1-O3 | 114.57(16) |
| C7-C6-C8 | 112.6(4) | O2-P1-O4 | 116.47(16) |
| O3-C6-C7 | 107.9(3) | O3-P1-C5 | 105.56(17) |
| O3-C6-C8 | 107.5(3) | O4-P1-C5 | 102.55(16) |
| C11-C9-C10 | 113.0(4) | O4-P1-O3 | 102.34(15) |
| 1-X,-Y,2-Z |  |  |  |

**Table 6 Torsion Angles for 3cc (EG-126).**

| **A-B-C-D** | **Angle/˚** | **A-B-C-D** | **Angle/˚** |
| --- | --- | --- | --- |
| C1-C5-P1-O2 | 78.2(3) | C9-O4-P1-C5 | 173.8(3) |
| C1-C5-P1-O3 | -155.3(3) | C9-O4-P1-O2 | 48.8(3) |
| C1-C5-P1-O4 | -48.5(3) | C9-O4-P1-O3 | -76.9(3) |
| C1-N1-N2-C2 | -0.1(4) | C10-C9-O4-P1 | -97.3(4) |
| C2-C3-C4-C41 | 180.0(4) | C11-C9-O4-P1 | 140.6(3) |
| C3-C2-N2-N1 | 180.0(3) | N1-C1-C5-P1 | 123.8(4) |
| C3-C2-O1-C1 | -179.9(3) | N1-C1-O1-C2 | -0.1(4) |
| C5-C1-N1-N2 | 179.0(4) | N2-C2-C3-C4 | -14.1(5) |
| C5-C1-O1-C2 | -179.1(3) | N2-C2-O1-C1 | 0.0(4) |
| C6-O3-P1-C5 | -74.2(3) | O1-C1-C5-P1 | -57.5(4) |
| C6-O3-P1-O2 | 51.8(3) | O1-C1-N1-N2 | 0.2(4) |
| C6-O3-P1-O4 | 178.8(3) | O1-C2-C3-C4 | 165.8(3) |
| C7-C6-O3-P1 | 112.2(3) | O1-C2-N2-N1 | 0.1(4) |
| C8-C6-O3-P1 | -126.1(3) |  |  |
| 1-X,-Y,2-Z | | | |

**Table 7 Hydrogen Atom Coordinates (Å×104) and Isotropic Displacement Parameters (Å2×103) for 3cc (EG-126).**

| **Atom** | ***x*** | ***y*** | ***z*** | **U(eq)** |
| --- | --- | --- | --- | --- |
| H3A | -876 | 2134.78 | 9422.43 | 32 |
| H3B | 472 | 2840.9 | 10424.06 | 32 |
| H4A | 1129.17 | -266.27 | 9120.96 | 32 |
| H4B | 2478.03 | 439.74 | 10122.04 | 32 |
| H5A | 6446.19 | 6196.94 | 8102.39 | 32 |
| H5B | 4837.79 | 7164.71 | 8888.01 | 32 |
| H6 | 3738.3 | 9506.64 | 7880.72 | 36 |
| H7A | 7698.76 | 9063.16 | 7912.53 | 55 |
| H7B | 7499.91 | 10831.84 | 7744.7 | 55 |
| H7C | 7977.07 | 9308.92 | 6883.21 | 55 |
| H8A | 4430.99 | 9654.27 | 5991.67 | 61 |
| H8B | 3885.55 | 11186.17 | 6834.61 | 61 |
| H8C | 1948.2 | 9627.32 | 6468.2 | 61 |
| H9 | 512.62 | 5027.85 | 5812.88 | 41 |
| H10A | -709.9 | 2003.32 | 6300.33 | 80 |
| H10B | -2354.5 | 2798.19 | 5712.73 | 80 |
| H10C | -1739.72 | 3688.36 | 6799.37 | 80 |
| H11A | 3512.16 | 3731.33 | 4980.54 | 67 |
| H11B | 1069.61 | 2668.35 | 4581.93 | 67 |
| H11C | 2701.84 | 2075.46 | 5273.65 | 67 |

CCDC for **3cc (EG-126)** is **2493467**
